# Supplementary material
Source: PubMed Central journal article supplement (PMC4152777)
Supplement: NIHMS614057-supplement-Supp_TableS1-S4___FigureS1-S3.pdf [file NIHMS614057-supplement-Supp_TableS1-S4___FigureS1-S3.pdf]

## Supplemental Material

NilD CRISPR RNA contributes to *Xenorhabdus nematophila* colonization of symbiotic host nematodes

Jeff L. Veesenmeyer, Aaron W. Andersen, Xiaojun Lu, Elizabeth A. Hussa, Kristen E. Murfin, John M. Chaston, Adler R. Dillman, Karen M. Wassarman, Paul W. Sternberg, and Heidi Goodrich-Blair

Supplemental Table 1. Regions of genome differences between XnSc 081 and XnSc 800

| Mutation     | Gene ID               | Gene name/Function                               | Effect on Coding Sequence |
|--------------|-----------------------|--------------------------------------------------|---------------------------|
| <b>SNVS</b>  |                       |                                                  |                           |
| T241,233C    | XNC1_0274             | <i>fabR</i> , transcriptional repressor fragment | Synonymous                |
| G241,237C    | XNC1_0274             |                                                  | Synonymous                |
| T270,582G    | XNC1_0323             | <i>rpsC</i> , 30S ribosomal subunit protein S3   | H139Q                     |
| A270,617T    | XNC1_0323             |                                                  | E151V                     |
| C270,642T    | XNC1_0323             |                                                  | Synonymous                |
| C270,880G    | XNC1_0324             | Hypothetical                                     | Synonymous                |
| C270,896A    | XNC1_0324             |                                                  | Q40K                      |
| T270,940G    | XNC1_0325             | <i>rlpP</i> , 50S ribosomal subunit protein L16  | V8G                       |
| T636,807G    | XNC1_0743             | <i>oppA3</i> , ABC Transporter family            | D2E                       |
| A653,167T    | Upstream of XNC1_0754 | <i>ahpC</i> , alkyl hydroperoxide reductase      | NA <sup>1</sup>           |
| T804,168G    | XNC1_0935             | Hypothetical                                     | M15L                      |
| C941,069A    | XNC1_1064             | <i>lpxC</i> , NAG deacetylase                    | NA                        |
| T941,071A    | XNC1_1064             |                                                  |                           |
| T941,131G    | XNC1_1064             |                                                  | V15G                      |
| T976,807A    | XNC1_1092             | Hypothetical                                     | Y40*                      |
| C1,065,676A  | Upstream XNC1_1197    | e14 prophage tail fiber protein                  | NA                        |
| G1,081,851C  | Downstream XNC1_1212  | Phage modular protein D                          | NA                        |
| G1,081,856C  | Downstream XNC1_1212  |                                                  | NA                        |
| T1,081,865C  | Downstream XNC1_1212  |                                                  | NA                        |
| G1,081,878C  | Downstream XNC1_1212  |                                                  | NA                        |
| T1,081,884,G | Downstream XNC1_1212  |                                                  | NA                        |
| T1,081,890G  | Downstream XNC1_1212  |                                                  | NA                        |
| T1,195,432C  | XNC1_1332             | <i>mrd</i> , peptidoglycan synthetase            | K195E                     |
| A1,422,830T  | XNC1_1543             | <i>infA</i> , Protein chain initiation factor    | L8*                       |
| C1,422,833T  | XNC1_1543             |                                                  | G7D                       |
| C1,712,985T  | XNC1_1774             | Hypothetical                                     | With Below                |
| A1,712,986C  | XNC1_1774             |                                                  | Q44S                      |
| A2,598,811T  | Downstream XNC1_2635  | NA                                               | Q44S                      |
| G2,898,177A  | XNC1_2903             | DnaG primase like seq                            | NA                        |
| G2,982,740A  | Upstream of XNC1_2997 | Chiting binding protein                          | Synonymous                |
| T3,490,398G  | XNC1_3605 Operon      | GroEL chaperone operon                           | NA                        |
| C3,490,857G  | XNC1_3606 Operon      | GroEL chaperone operon                           | NA                        |
| T3,495,578A  | Downstream XNC1_3616  | BamHI control element                            | NA                        |
| G3,704,993A  | XNC1_3848             | <i>pcm</i>                                       | Q156*                     |
| G3,839,515A  | Upstream XNC1_3977    | Hypothetical                                     | NA                        |
| T3,839,518A  | Upstream XNC1_3977    |                                                  | NA                        |
| T3,839,519A  | Upstream XNC1_3977    |                                                  | NA                        |
| A3,839,525C  | Upstream XNC1_3977    |                                                  | NA                        |
| A3,839,526G  | Upstream XNC1_3977    |                                                  | NA                        |
| A3,839,634G  | XNC1_3978             | <i>gmhB</i>                                      | C156R                     |
| A3,839,640G  | XNC1_3978             |                                                  | F154L                     |
| C3,839,695T  | XNC1_3978             |                                                  | Synonymous                |
| G3,839,718T  | XNC1_3978             |                                                  | L128M                     |
| T3,839,751A  | XNC1_3978             |                                                  | M117L                     |
| C3,933,193G  | XNC1_4062             | <i>imp</i> , organic solvent tolerance protein   | Synonymous                |
| G3,933,205T  | XNC1_4062             |                                                  | K246N                     |
| A3,933,207T  | XNC1_4062             |                                                  | N247I                     |
| G3,933,223T  | XNC1_4062             |                                                  | E252D                     |

|                             |                                |                                                       |               |
|-----------------------------|--------------------------------|-------------------------------------------------------|---------------|
| C3,933,272A                 | XNC1_4062                      |                                                       | H269N         |
| A4,204,557T                 | XNC1_4379                      | <i>rpoB</i> , RNA polymeras subunit                   | D516V         |
| <b>Frameshift Mutations</b> |                                |                                                       |               |
| -36,438A                    | XNC1_0034                      | <i>gidA</i> , glucose-inhibited division protein      | G19fs         |
| -241,252A                   | XNC1_0274                      | <i>fabR</i> , transcriptional repressor               | NA            |
| A270,818-                   | XNC1_0324                      | <i>rpsC</i> , 30S ribosomal subunit protein S3        | E218fs, K14fs |
| C270,859-                   | XNC1_0324                      |                                                       | G27fs         |
| C270,868-                   | XNC1_0324                      |                                                       | V30fs         |
| C270,875-                   | XNC1_0324                      |                                                       | Q33fs         |
| C270,890-                   | XNC1_0324                      |                                                       | P38fs         |
| -653,167T                   | Upstream XNC1_0753             | <i>ggt</i> , gamma glutamine transpeptidase           | NA            |
| G653,171-                   | Upstream XNC1_0753             |                                                       | NA            |
| G655,360-                   | XNC1_0757/0758                 | S-adenosylmethionine tRNA<br>riobsyltransferase       | NA            |
| T940,085                    | XNC1_1062                      | Tubulin-like GTP-binding protein/GTPase               | NA            |
| A976,820-                   | Upstream XNC1_1093             | <i>MscS</i> , mechanosensitive channel protein        | NA            |
| -976,832A                   | Upstream XNC1_1093             |                                                       | NA            |
| -1,081,791T                 | Downstream XNC1_1212           | Phage modular protein D                               | NA            |
| A,1081,795-                 | Downstream XNC1_1212           |                                                       | NA            |
| A1,081,807-                 | Downstream XNC1_1212           |                                                       | NA            |
| A1,130,532-                 | Upstream tRNA-Ser              | NA                                                    | NA            |
| -1,422,844T                 | XNC1_1543                      | <i>infA</i>                                           | H4fs          |
| T1,496,524-                 | Upstream XNC1_1603             | Hypothetical                                          | NA            |
| G1,496,534-                 | Upstream XNC1_1603             |                                                       | NA            |
| A2,027,395-                 | Upstream XNC1_2116             | Putative potassium transport                          | NA            |
| G3,490,877-                 | XNC1_3606 Operon               | GroEL chaperone                                       | NA            |
| A3,490,907                  | XNC1_3606 Operon               | GroEL chaperone                                       | NA            |
| T3,490,920                  | Promoter upstream<br>XNC1_3607 | GroEL chaperone                                       | NA            |
| G4,429,599                  | Promoter upstream<br>XNC1_4642 | <i>mnmE</i> , GTPase involved in tRNA<br>modification | NA            |

<sup>1</sup>NA indicates a mutation that does not affect the coding sequence of any predicted open reading frame

Supplemental Table 2. CRISPR loci of *X. nematophila* (HGB800) designated alphabetically according to their chromosomal position.

| CRISPR Region | Coordinates (HGB800 genome) | Repeat # | Notable features                                                                                                                                        |
|---------------|-----------------------------|----------|---------------------------------------------------------------------------------------------------------------------------------------------------------|
| A             | 881776-882019               | 2        | Spacer identical to that of CRISPR-B                                                                                                                    |
| B             | 1814239-1814329             | 2        | Spacer identical to that of CRISPR-A. Encoded near 3' end of repeat region C.                                                                           |
| C             | 1814463-1815955             | 25       | Spacer 22 is 100% identical to XNC1_3681, a XnSc chromosomal gene of unknown function                                                                   |
| D             | 3320125-3320276             | 3        | Highly divergent repeat sequence                                                                                                                        |
| E             | 3577918-3579107             | 20       | CAS-proximal (upstream); Spacer 4 is 100% identical to XNC1_2560 ( <i>xptE1</i> ), a XnSc chromosomal gene predicted to encode an A subunit of Tc toxin |
| <i>nilD</i>   | 3579434..3579491            | 2        | Necessary for nematode colonization                                                                                                                     |
| G             | 3589391_3590272             | 16       | CAS-proximal (downstream)                                                                                                                               |

Supplemental Table 3: Colonization analysis of HGB315 (*nilD6::Tn5*) carrying SR2 deletion constructs<sup>a</sup>

| Plasmid        | <i>orf1</i> | <i>orf2</i> | RNA  | XnSc 081    | XnSc 081          |
|----------------|-------------|-------------|------|-------------|-------------------|
|                |             |             |      | wild-type   | <i>nilD6::Tn5</i> |
| pBCSK+         | n.a.        | n.a.        | n.a. | 37.3 ± 12.3 | 0.8 ± 0.1         |
| pSR2-312       | +           | +           | +    | 38.3 ± 13.3 | 43.6 ± 16.5       |
| pSR2-ΔR90      | -           | +           | +    | 31.9 ± 2.2  | 49.1 ± 23.9       |
| pSR2-ΔR126     | -           | +           | -    | 53.8 ± 23.7 | 0.1 ± 0.0         |
| pSR2-ΔL84      | +           | -           | +    | 18.7 ± 5.4  | 90.3 ± 43.8       |
| pSR2-ΔL132     | +           | -           | +    | 15.6 ± 4.5  | 40.9 ± 23.5       |
| pSR2-ΔL161     | +           | -           | -    | 40.3 ± 20.6 | 0.1 ± 0.0         |
| pSR2-ΔR90/ΔL84 | -           | -           | +    | 32.1 ± 11.4 | 53.4 ± 4.0        |

a. Each construct was tested 3 independent times and colonization data represent average cfu/IJ ± standard error.

Supplemental Table 4: Oligonucleotides used in this study

| Name                                    | Sequence (5'-3')                              |
|-----------------------------------------|-----------------------------------------------|
| <b>PCR Amplification and Sequencing</b> |                                               |
| KHP36N                                  | CATGGCTACTTTGAATTTCC                          |
| KHP55                                   | ATGTTTCCCGTTAATACGG                           |
| KHP57                                   | GAAGAAAGATAAAGAATTGG                          |
| KHP58                                   | TATTTATCCCCGTACTTACG                          |
| KHP62                                   | TATACCTACAGTGCTTTACC                          |
| KHP63                                   | TCAACGAAAAACAAGAAGC                           |
| KHP64                                   | ACAAGGAAATTCAAAGTAGCC                         |
| KHP65                                   | CTACCATTTTTTCAGCCAAT                          |
| NiID 5' Apal                            | AAAGGGCCCTCTACCATTTTTTCAGC                    |
| NiID 3' KpnI                            | AAAGGTACCCTAGATATGCAAACCTC                    |
| SR-2 Websteri 5'                        | ATTTCCCCGCCGATTAATATGCCAAAACCT                |
| SR-2 Websteri 3'                        | CGTACTTACGGGGAACACATCATTGCCTGAACA             |
| RPA Probe SDM 5'                        | CCATAGCTCCTTTAAATTTCTTGATTATAACTCCATGTTCCCCG  |
| RPA Probe SDM 3'                        | CGGGGAACATGGAGTTATAATCAAGGAAATTTAAAGGAGCTATGG |
| 27F                                     | AGAGTTTGATCATGGCTCAG                          |
| 1492R                                   | TACGGTTACCTTGTTACGACTT                        |
| <b>Primer Extension and Northern</b>    |                                               |
| AAP1                                    | CCGTACTIONACGGGGAACATGG                       |
| AAP2                                    | GGAGTTATAAACAAGGAAATTC                        |
| <b>Mutant Construction</b>              |                                               |
| dNiID Up 5' Sall                        | AAAGTCGACTGTGCGCCCAATGCG                      |
| dNiID Up 3' Apal                        | AAAGGGCCCTACTATTCGT                           |
| dNiID Dwn 5' Apal                       | AAAGGGCCCGAATCCGTTCTATTC                      |
| dNiID Dwn 3' SacI                       | AAAGAGCTCAATTCACACCTGACTCCG                   |
| Kan 5' Apal                             | AAAGGGCCCCCACGTTGTGTCTCAAATCT CTG             |
| Kan 3' Apal                             | AAAGGGCCCTTAGAAAACTCATGGAGCATCAAATG           |
| Cas3UpFwd_Spel                          | ATATATACTAGTCCATGGCTACTTTGAATTTCTTTG          |
| Cas3DownRev_XbaI                        | ATATATTCTAGACGGATTCCACCGATAGGGTG              |
| Kan-Clean Rev_EcoRV_NEW                 | ATATATGATATCTTAGAAAACTCATCGAGCATC AAATG       |
| Kan-FullFwd NheI_NEW                    | ATATATGCTAGCCACGTTGTGTCTCAAATCTCTG            |
| casEUpF_Spel                            | ATATATACTAGTCTTTACCGCCGTGGACGAT               |
| casEDownR_XbaI                          | ATATATTCTAGAATAAAGGTTTACCCGTGTGCAGA           |
| casEDownF_EcoRV                         | ATATATGATATCGATTACAGGCAAACAGCGGC              |
| casEUpR2_NheI                           | ATATAGCTAGCGCAAGGTGACTTTAGACAG ATACA          |
| NiID SDM set 1F (bases 2-3)             | CGGGAATAAACCATGGCCACCTTGAATTTCTTTGTT          |
| NiID SDM set 1R (bases 2-3)             | AACAAGGAAATTCAGGTGGCCATGGTTTAT TCCCG          |
| NiID SDM set 2F (bases 4-5)             | GAATAAACCATGGCCACCTTAACTTCTTTG TTTATAAC       |
| NiID SDM set 2R (bases 4-5)             | GTTATAAACAAGGAAGTTTAAAGGTGGCCAT GTTTATTC      |
| NiID SDM set 3F (bases 6-7)             | CCATGGCCACCTTAACTTTCTCGTTTATA ACTCCATG        |
| NiID SDM set 3R (bases 6-7)             | CATGGAGTTATAAACGAGAAAGTTTAAAGGT GGCCATGG      |
| NiID SDM set 4F (bases 8-9)             | GCCACCTTAACTTTCTCGTGTACAACCTCC ATGTTCCCC      |
| NiID SDM set 4R (bases 8-9)             | GGGGAACATGGAGTTGTACACGAGAAAGTT TAAGGTGGC      |
| NiID SDM set 5F (bases 10-11)           | CTTAACTTTCTCGTGTACAATTCTATGTTCCC CGTAAGTAC    |
| NiID SDM set 5R (bases 10-11)           | GTACTTACGGGGAACATAGAATTGTACACGAGA AAGTTTAAAG  |
| CasE 5' XbaI                            | AAATCTAGACCGATGTATCTGTCTAAAGTCACC             |
| CasE 3' EcoRV                           | AAAGATATCCCATTACAGCGCCCTTATCAG                |
| <b>Vector Construction</b>              |                                               |
| TOPO2.1mini_Fwd_NcoI                    | ATATATCCATGGCGATGCCTGC                        |
| TOPO2.1mini_Rev_NcoI                    | ATATATCCATGGTCCATTCGCCATTCAGGC                |
| pECM20_Xb_F                             | GGGCCCGGATCAGATCTCGTTGTGTCTCA                 |
| pECM20_Xb_R                             | GGGCCCNNGGTACCGTGTGACCTGCAGATGGAGA            |
| pECMXb_insert_F                         | GGGCCAGACGACATTGGCTGACTTGA                    |
| pECMXb_insert_R                         | GGTACCAAACCTAAATCACAAAAGCACA                  |
| pECMXb_seq_F                            | AGGCCGGATAAACTTGTGC                           |
| pECMXb_seq_R                            | TGGGACAACTCCAGTGAAGAG                         |
| pECMXb_integration_F                    | ATTGTTGATCGTGAGAAGTCG                         |
| pECMXb_integration_R                    | CTCCAATAAAGCGAATCCAG                          |

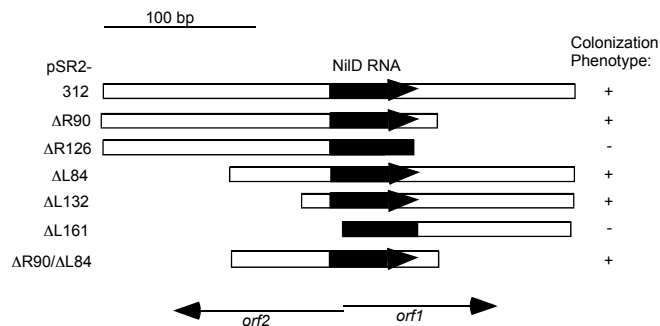

**Supplemental Figure 1.** Deletion analysis of the *nilD* region indicates neither *orf1* nor *orf2* is required in its entirety to rescue the colonization defect of the *nilD6*::Tn5 mutant in plasmid complementation assays. Schematic representations of the deletion constructs tested for their ability to complement the colonization defect of the XnSc HGB081 *nilD6*::Tn5 mutant. The name of the plasmid carrying each fragment is shown on the left and is named according to whether the deletion truncates the 5' ( $\Delta$ L) and/or 3' ( $\Delta$ R) ends, and the size of the deleted region. *orf1* and *orf2* positions are indicated by arrows at the bottom of the figure, and the region encoding the 58-nt NiID RNA (see main text and Fig. 1) is shaded in black, with an arrow representing the full NiID RNA sequence and a rectangle indicating a truncation of the NiID RNA coding sequence. The colonization phenotype of XnSc HGB081 *nilD6*::Tn5 carrying each plasmid construct is indicated to the right (see Table S3 for data).

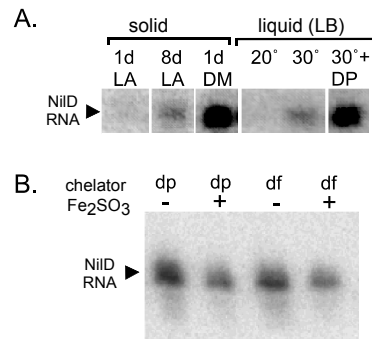

### Supplemental Figure 2

**A)** NiID RNA expression under various conditions. Protection assays were performed with RNA isolated from wild-type HGB081 cells cultured on solid (lanes 1-3) or liquid (lanes 4-6) medium. RNA was isolated from cells growing on LA for 1 (lane 1) or 8 (lane 2) days or on solid defined medium (DM) for 1 day (lane 3). Cells were grown in liquid LB at 20°C (lane 4) or 30°C (lane 5) or in LB supplemented with 2,2-dipyridyl (DP) at 30°C (lane 6). A representative experiment is shown; similar results were obtained in 2 independent experiments. Little NiID RNA-protected fragment was observed on LA plates after 1 d of incubation, with substantially more at 8 d, suggesting NiID RNA is elevated in nutrient-limited or aged cells. Indeed, NiID RNA was more abundant in *X. nematophila* incubated 1 d on a solid defined medium (see experimental procedures) than in 1 d LA plates (compare lanes 1 and 3), further suggesting that NiID RNA abundance is affected by nutrient availability. The elevated levels of NiID RNA do not appear to be the result of slow growth, since higher levels were not observed in cells grown at 20°C relative to cells grown at the optimal *X. nematophila* growth temperature (30°C). Instead, increased NiID RNA levels may be triggered by iron limitation since higher levels were detected after growth in LB supplemented with 2, 2-dipyridil (an Fe(II) chelator) than in LB alone (compare lanes 5 and 6).

**B)** NiID RNA expression during growth with iron chelators. Protection assays were performed with RNA isolated from wild-type HGB081 cells cultured in LB + 2,2-dipyridyl (lane 1, dp, -), LB + 2,2-dipyridyl + Fe<sub>2</sub>SO<sub>3</sub> (lane 2, dp, +), LB + deferoxamine (Lane 3, df, -), or LB + deferoxamine + Fe<sub>2</sub>SO<sub>3</sub> (lane 4, df, +). A representative experiment is shown; similar results were obtained in 2 independent experiments. RNA (i.e. protected fragment) levels similar to that found in LB grown cultures (data not shown) were observed in *X. nematophila* cells grown in the presence of iron chelators specific for Fe(II) or Fe(III) without exogenously added iron (Average ± SD, n=2, radioactivity relative to growth in LB: Deferoxamine, 1.19 ± 0.14; 2,2-dipyridyl, 0.94 ± 2.0). This result is in contrast to those obtained and shown in Fig. S2A, in which RNA levels were higher in the presence of chelator than in its absence. However, levels of iron in LB media preparations were not controlled, and it is likely that the LB-grown cells shown in Fig. S2B had already begun to experience iron limitation when they were harvested. Indeed, when Fe<sub>2</sub>SO<sub>3</sub> was included in addition to the iron chelators the level of protected fragment was lower than that during growth in LB alone (Average ± SD, n=2, radioactivity relative to growth in LB: Deferoxamine + Fe<sub>2</sub>SO<sub>3</sub>, 0.54 ± 0.06; 2,2-dipyridyl + Fe<sub>2</sub>SO<sub>3</sub>, 0.59 ± 0.03). No protected fragments were detected in samples of RNA isolated from HGB315 niID6::Tn5 cells grown under each of these conditions (data not shown).

Within each panel, all samples were run on a single gel, but for A, irrelevant lanes were removed by manipulation in Adobe Photoshop after visualization was enhanced through contrast.

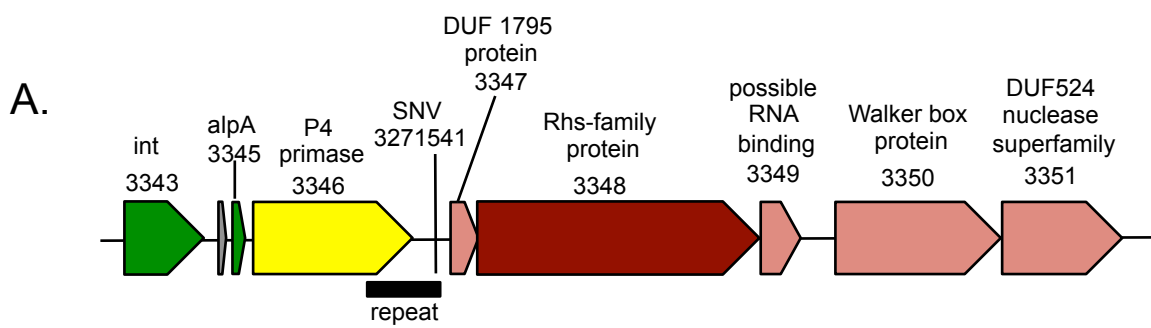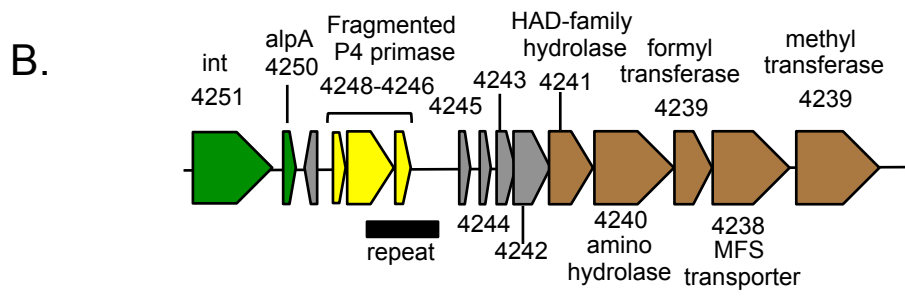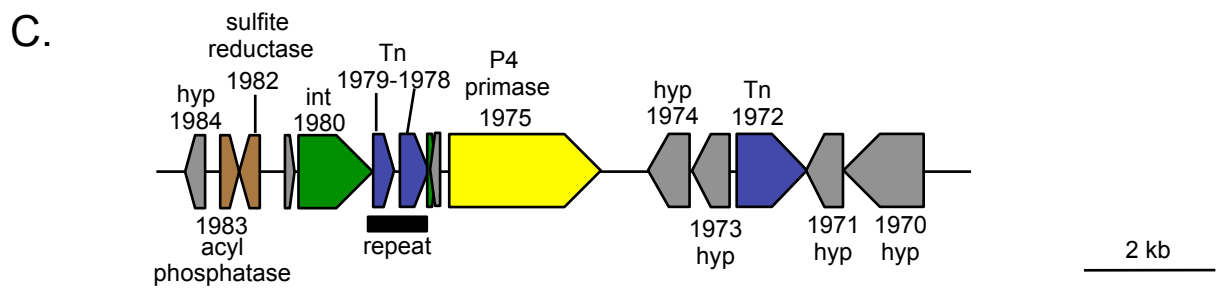

**D.**

```

3271521-ATTCTTTAATAGGG*AGGGGGTAAATAAAAAGGTTTT*TCTG-3271560
4088780-ATTCTTTAATAGGGCAGGGG*TAGATAAAAAGGTTTT*TCTG-4088741
1870884-ATTCTTTAATAGGG*AGGGG*TAGATAAAAATGTTTTCTCTG-1870845
  
```

**Supplemental Figure 3 (A)** Genomic context of the single nucleotide variant (SNV), C-3271541-T, that distinguishes the *niID6::Tn5* strain background from the XnSc 081 parent background. The SNV occurs within a 1147-bp sequence (black rectangle) that is repeated in two other regions of the genome, one at full length (**B**) and the other truncated by 208-nt (**C**). Predicted open reading frames (box arrows) are labeled with their XNC1\_ORF designation and predicted putative function. The boxes representing predicted P4 primases encoded at each locus are yellow whereas additional predicted functional categories are indicated by the following color scheme: Maroon (Rhs-family protein); Light red (potential Rhs-related proteins); Green (phage-related); Brown (metabolic); Blue (transposon and IS elements); Gray (hypothetical ORFs). A 2-kb scale bar for A-C is shown on the lower right. (**D**) Alignment of 40-nt of the repeat region surrounding the SNV (red underlined nucleotide). Within the 40-nt, sequence differences among the three repeats are highlighted as blue text and asterisks mark indels.
